# Supplementary material
Source: Royal Society of Chemistry journal article supplement (doi:10.1039/d6ta01562j)
Supplement: d6ta01562j1.pdf [file d6ta01562j1.pdf]

1 **Phosphonitrile-based Porous Polymer Interfaces for Coupled Homogenization of**  
2 **Zn<sup>2+</sup> Flux and Interfacial Electric Field Distribution Enabling Dendrite-free**  
3 **Zinc Anodes**

4 Lei-Guo Li <sup>a, b</sup>, Wei-Hai Yi <sup>a, b</sup>, Wen-Jie Shi <sup>a, b</sup>, Xin-Ying Ren <sup>a, b</sup>, Min-Peng Li <sup>a, b</sup>, Meng-Chao Liu  
5 <sup>a, b</sup>, Ming-Hui Yang <sup>a, b</sup>, Hong-Yan Li <sup>a, b</sup>, and Mao-Cheng Liu <sup>a, b</sup>\*

6 <sup>a</sup> State Key Laboratory of Advanced Processing and Recycling of Non-ferrous Metals, Lanzhou  
7 University of Technology, Lanzhou 730050, People's Republic of China

8 <sup>b</sup> School of Materials Science and Engineering, Lanzhou University of Technology, Lanzhou 730050,  
9 People's Republic of China

10

11 **Chemicals and Materials**

12 Phosphonitrilic chloride trimer (N<sub>3</sub>P<sub>3</sub>Cl<sub>6</sub>, 98%), *p*-hydroxybenzaldehyde (AR), *m*-Phenylenediamine  
13 (*m*-PD, 98%), ammonium metavanadate (NH<sub>4</sub>VO<sub>3</sub>, ≥99.9%), and citric acid (C<sub>6</sub>H<sub>8</sub>O<sub>7</sub>, ≥99.5%) were  
14 purchased from Shanghai Aladdin Biochemical Technology Co., Ltd. (Shanghai, China). Dimethyl  
15 sulfoxide (DMSO), tetrahydrofuran (THF), potassium carbonate (K<sub>2</sub>CO<sub>3</sub>), *N*-methylpyrrolidone  
16 (NMP), and acetone were obtained from Sinopharm Chemical Reagent Co., Ltd. (China). All  
17 chemicals were used as received without further purification.

18 **Synthesis of HAPCP and PPOP**

19 N<sub>3</sub>P<sub>3</sub>Cl<sub>6</sub> (2.09 g, 6.0 mmol) and *p*-hydroxybenzaldehyde (4.5 g, 36.8 mmol) were added sequentially  
20 to a 50 mL THF solution containing K<sub>2</sub>CO<sub>3</sub> (10 g, 10.8 mmol). The mixture was heated to 50 °C and  
21 stirred under a nitrogen atmosphere for 3 days. After cooling to room temperature, 100 mL of water  
22 was added, and the reaction mixture was stirred for an additional 3 h at room temperature. The  
23 resulting precipitate was collected by filtration, washed thoroughly with water until it turned white,  
24 and dried under reduced pressure at 60 °C for 48 h to yield the hexakis (4-formylphenoxy)  
25 cyclotriphosphazene (HAPCP) monomer in 90% yield.

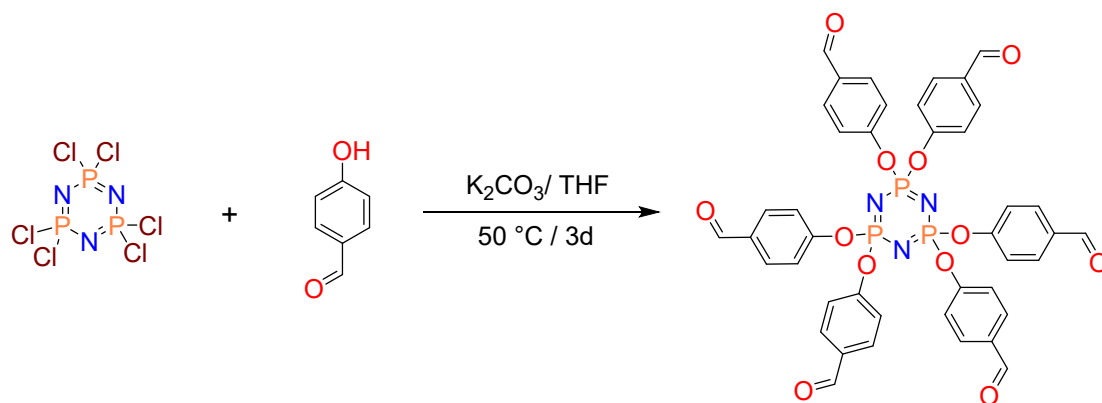

1  
2 **Scheme S1:** Schematic illustration of the synthetic routes of HAPCP [N<sub>3</sub>P<sub>3</sub>(OC<sub>6</sub>H<sub>4</sub>CHO)<sub>6</sub>]

3 Under a nitrogen atmosphere, HAPCP (400 mg) and DMSO (4.0 mL) were added to a 25 mL reaction  
4 vessel. After stirring for 5 min, the m-PD (150.7 mg) dissolved in DMSO (2 mL) was introduced at  
5 a rate of 0.05 mL min<sup>-1</sup> at 50 °C using a syringe pump over 45 min. The oil-bath temperature was  
6 then gradually increased to 160 °C over 20 min. After the nitrogen flow stopped, the system remained  
7 under a nitrogen atmosphere. When the oil bath reached 160 °C, reflux became visible inside the  
8 flask, and bright yellow to dark-brown solid precipitates typically formed within 10–30 min. The  
9 reaction was maintained at 160 °C under nitrogen for an additional 24 h. Upon completion, the  
10 mixture was cooled to room temperature, filtered, and washed three times with anhydrous  
11 tetrahydrofuran, followed by Soxhlet extraction with THF for 24 h. The final product was dried under  
12 vacuum at 60 °C for 24 h to obtain PPOP solid, being ground with a mortar and pestle into a fine  
13 powder.

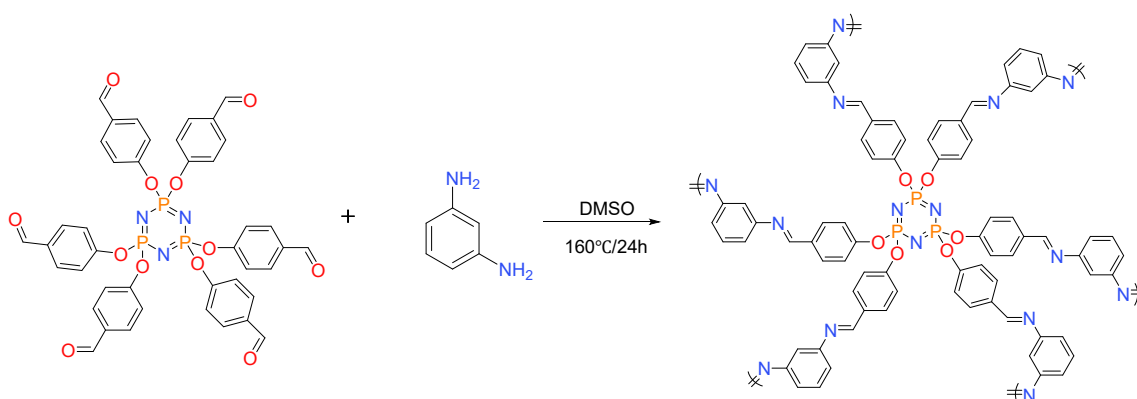

14  
15 **Scheme S2:** Schematic illustration of the synthetic routes of PPOP

### 16 **Synthesis of ammonium vanadate (NVO).**

17 2.632 g of NH<sub>4</sub>VO<sub>3</sub> was dissolved in 90 mL of deionized water, then 4.323 g of C<sub>6</sub>H<sub>8</sub>O<sub>7</sub> was added.  
18 The mixture was stirred in a 70°C water bath for 30 minutes and then transferred to a 150 mL teflon

1 lined autoclave and heated at 180°C for 10 h. After natural cooling to room temperature, the resulting  
2 precipitate was separated by centrifugation and washed three times with deionized water and ethanol.  
3 The final product was dried at 80°C for 12 h to obtain an NVO sample.

#### 4 **Fabrication of PPOP@Zn anode**

5 Commercial zinc foil (thickness: 0.02 mm, Zn content  $\geq$  99.9%) was used as the substrate for  
6 fabricating the Zn anode. A homogeneous slurry was prepared by mixing 90 mg of the N/P-doped  
7 porous polymer (PPOP), 10 mg of polyvinylidene fluoride (PVDF) as a binder, and NMP (0.5 mL)  
8 as the dispersing solvent. The resulting slurry was uniformly cast onto the exposed surface of the zinc  
9 foil and subsequently dried in a vacuum oven at 70 °C for 24 h to obtain the PPOP@Zn anode.

#### 10 **Material characterizations**

11 X-ray diffraction (XRD) patterns were recorded on a Rigaku Mini Flex 600 diffractometer using Cu  
12  $K\alpha$ -radiation (0.15406 nm). Morphology images were collected on a field emission scanning electron  
13 microscope (FESEM, FEI Nova NanoSEM 230, 10 kV). Analysis of the chemical state of the  
14 elements in the samples by X-ray photoelectron spectroscopy (XPS) using the ESCALAB 250Xi  
15 model. Fourier transform infrared (FT-IR) was tested to discover the appearance of a new chemical  
16 bond in HAPCP and PPOP. Chemical structure analysis via Raman spectroscopy (Auspectrum  
17 Tiancheng ATR8800s). The contact angle between the electrolyte and the Zn electrode was measured  
18 by a contact angle measuring instrument (JC2000D1, Shanghai Power each Digital Technology  
19 Equipment Co, Ltd).

#### 20 **Electrochemical measurements**

21 All electrochemical measurements were carried out under ambient conditions using CR2032 coin  
22 cells. The synthesized PPOP@Zn electrodes ( $\Phi = 14$  mm) were employed as the anodes, glass fiber  
23 membranes (GF/D, Whatman) were used as separators, and 2 M ZnSO<sub>4</sub> aqueous solution (100  $\mu$ L)  
24 served as the electrolyte to assemble symmetrical battery. For the full cells, the cathode slurry was  
25 prepared by mixing NVO powder, Super P, and PVDF at a mass ratio of 7:2:1 in NMP. The slurry  
26 was cast onto titanium foil using a doctor blade and dried in a vacuum oven at 60 °C for 24 h. All  
27 battery assembly is performed in an air-free environment. In the PPOP@Zn||NVO full battery, NVO  
28 was used as the cathode material, and 2.0 M ZnSO<sub>4</sub> aqueous solution was employed as the electrolyte.  
29 A three-electrode system (PPOP@Zn working electrode, SCE reference, Pt counter) was used for

1 linear polarization measurements in 1 M Na<sub>2</sub>SO<sub>4</sub>; corrosion parameters were derived via Tafel  
2 extrapolation on a CHI760E electrochemical workstation (Chenhua, Shanghai), which was also  
3 employed for Cyclic voltammetry (CV), electrochemical impedance spectroscopy (EIS) and linear  
4 sweep voltammetry (LSV) tests. Galvanostatic charge–discharge cycling tests were conducted at  
5 room temperature using a LAND battery testing system (CT2001A, China).  
6 EIS are recorded from 293.15 K to 333.15 K with the Arrhenius equation (1) to calculate  $E_a$ .

$$R_{ct} = A * \exp\left(\frac{E_a}{RT}\right) \quad (1)$$

7  
8 where  $R_{ct}$  is the interface resistance, A is the frequency factor, R is the gas constant, and T is the  
9 absolute temperature.

10 The Zn<sup>2+</sup> transfer numbers are evaluated utilizing symmetric cells combined by EIS before and after  
11 the chronoamperometry (CA) test, and they are calculated by the following equation (2).

$$t_{zn^{2+}} = \frac{I_s(\Delta V - I_0 R_0)}{I_0(\Delta V - I_s R_s)} \quad (2)$$

12  
13 where  $\Delta V$  is the constant polarization voltage applied (20 mV),  $R_0$  and  $I_0$  are the initial resistance  
14 and current, and  $R_s$  and  $I_s$  are the resistance and steady-state current, respectively.

15 The exchange current density related to the Zn electrodeposition process at various current densities  
16 can be calculated from equation (3).

$$i = i_0 \frac{2F}{RT} \eta \quad (3)$$

17  
18 where  $i$  is running current density,  $i_0$  represents the exchange current density, F and R are the  
19 Faraday constant and the gas constant, respectively, T is the absolute temperature, and  $\eta$   
20 corresponds to the total overpotential.

21 The electric double-layer capacitance (EDLC) value was calculated by the equation as follows:

$$c = \frac{i}{v} \quad (4)$$

22  
23 where C means the capacitance,  $i$  corresponds to the current and was defined by half of the  
24 difference between positive and negative scanning current at each scanning rate.

## 25 **Density functional theory (DFT) calculations**

26 First-principles calculations based on density functional theory (DFT) were used to determine the key

1 thermodynamic parameters. All calculations were performed using the Vienna ab initio simulation  
2 package (VASP). The electron-ion interaction was described by the projector augmented wave  
3 (PAW) method, and the exchange-correlation functional was treated with the generalized gradient  
4 approximation (GGA) using the Perdew-Burke-Ernzerhof (PBE) parameterization scheme. The  
5 empirical dispersion correction using the DFT-D3 method of Grimme was employed to describe the  
6 van der Waals interactions accurately. A plane-wave energy cutoff of 520 eV was used. For structural  
7 optimization, the Brillouin zone was sampled with a Monkhorst-Pack  $2 \times 2 \times 1$  k-point mesh. The  
8 geometric structure was fully relaxed until the force on each atom was less than  $0.03 \text{ eV \AA}^{-1}$  and the  
9 energy convergence criterion was set to  $10^{-4} \text{ eV}$ . Additionally, a  $15 \text{ \AA}$  vacuum layer was applied along  
10 the direction perpendicular to the Zn substrate to mitigate interactions between periodic images. The  
11 climbing image nudged elastic band (CI-NEB) method was employed to locate the transition states  
12 along key reaction pathways. Four intermediate images were used, and the calculations converged  
13 when the residual forces on all atoms fell below  $0.03 \text{ eV \AA}^{-1}$ , thus ensuring the accurate identification  
14 of first-order saddle points.

15 The binding energy ( $E_{ads}$ ) was calculated according to:

$$16 \quad E_{ads} = E_{total} - E_{Zn^{2+}} - E_{PPOP}$$

17 where  $E_{total}$  is the total energy of the adsorption system,  $E_{Zn^{2+}}$ , and  $E_{PPOP}$  represent the energies of the  
18  $Zn^{2+}$ , and the PPOP layer structure, respectively.

19

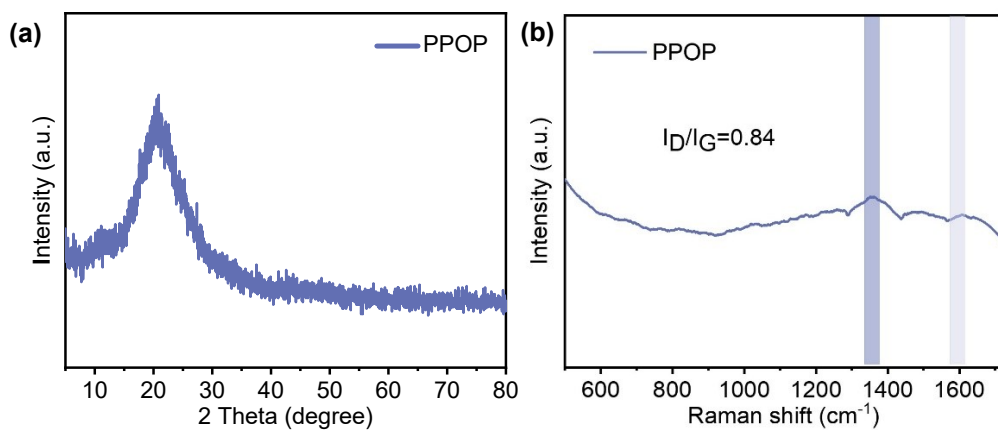

1  
2 Figure S1. a) XRD patterns of PPOP powder. b) Raman spectrum of PPOP.

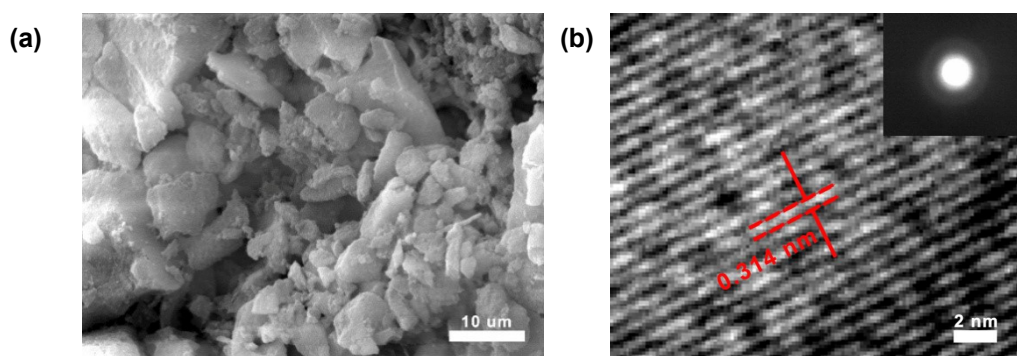

3  
4 Figure S2. a) SEM images of Zn foil coated with PPOP. b) TEM image of PPOP.

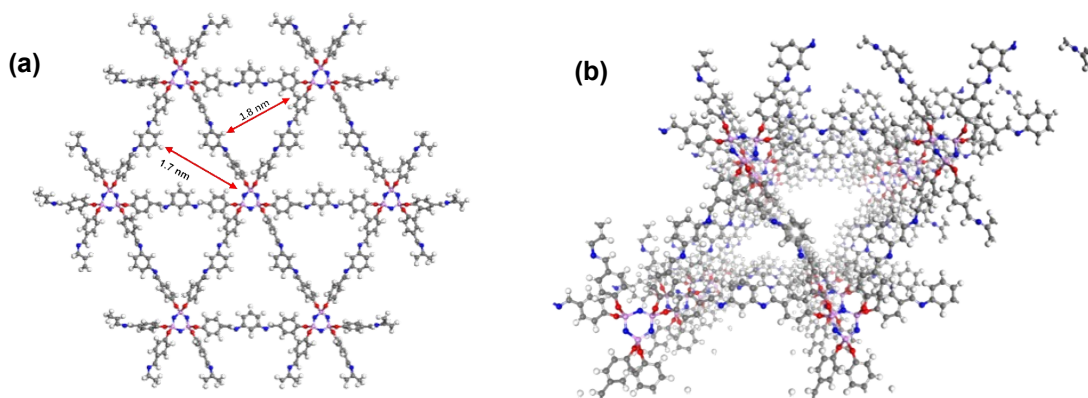

5  
6 Figure S3. The simulated structure of PPOP with a) ion transport nanochannels b) 3D aperture  
7 distribution.

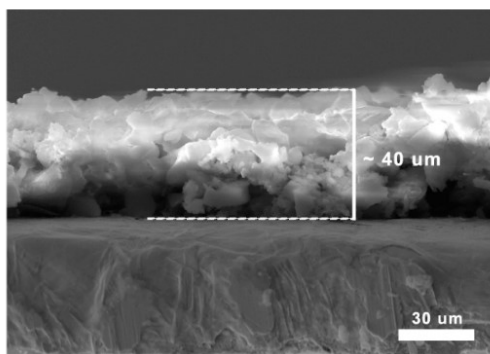

1

2

Figure S4. SEM image of the Cross-sectional view of the PPOP layer.

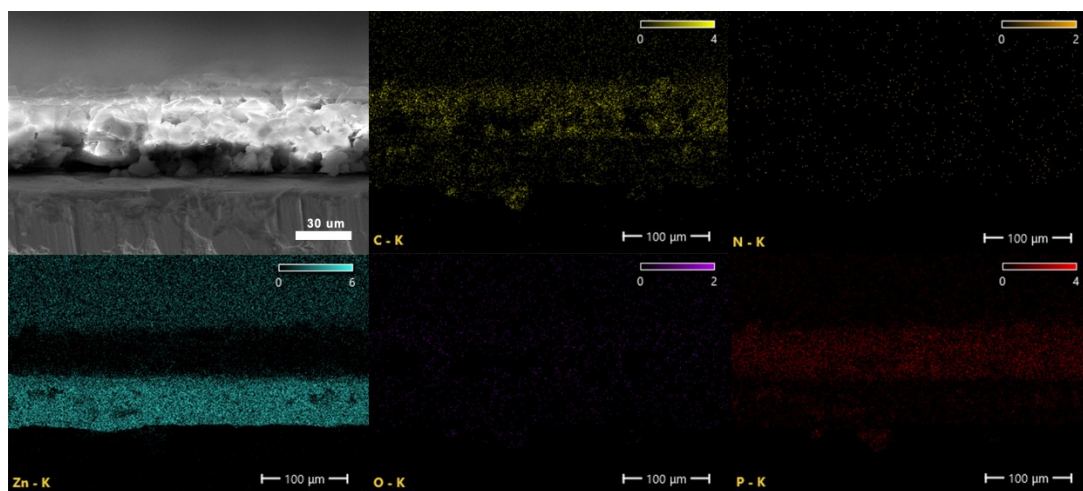

3

4

Figure S5. EDS mapping of C, P, O, N and Zn element distribution of the PPOP.

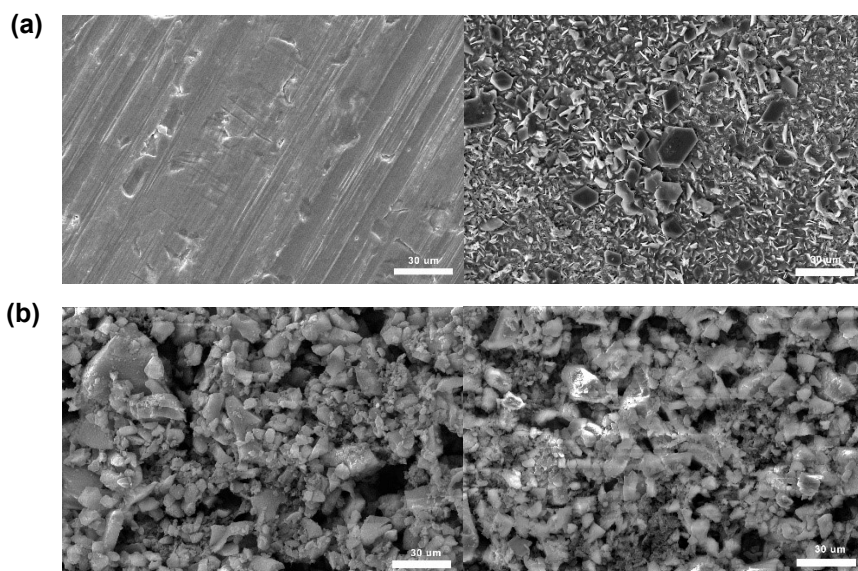

5

6

7 Figure S6. SEM image of Bare Zn and PPOP@Zn after immersion in 2 M ZnSO<sub>4</sub> electrolyte for 7  
8 days.

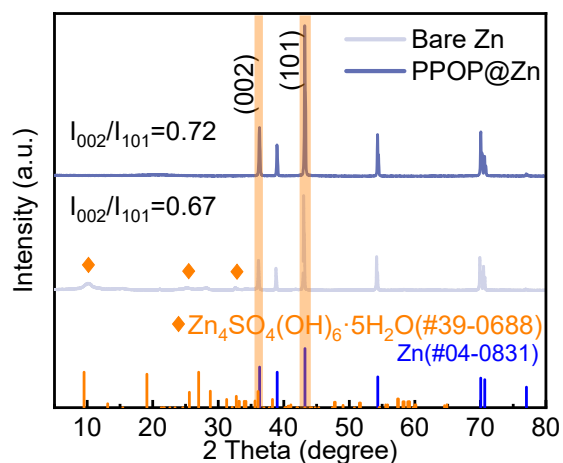

1  
2 Figure S7. XRD patterns of Bare Zn and PPOP@Zn anodes after 200 cycles at 2 mA cm<sup>-2</sup>.

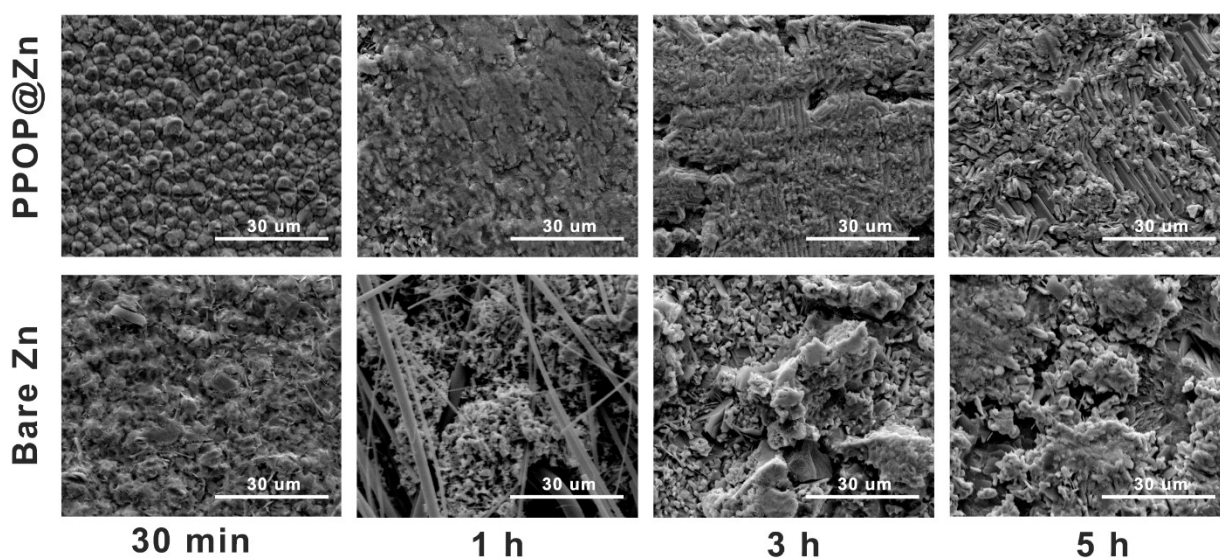

3  
4 Figure S8. SEM image of PPOP@Zn and bare Zn anodes after deposition for 30 min, 1, 3, and 5 h at 1  
5 mA cm<sup>-2</sup>.

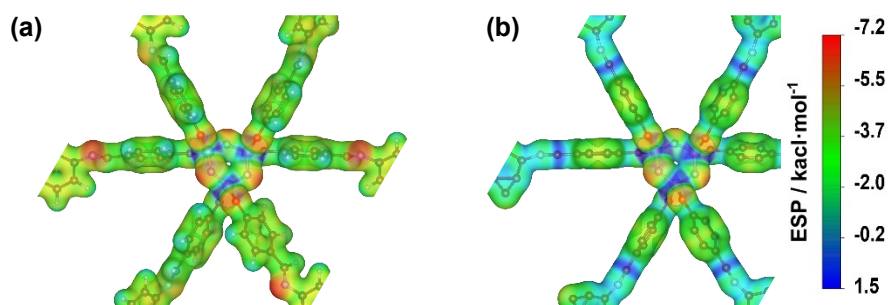

6  
7  
8 Figure S9. Electrostatic potential (ESP) distribution diagrams of a) PPOP b) Zn<sup>2+</sup> at site 1 in PPOP  
9 molecules.

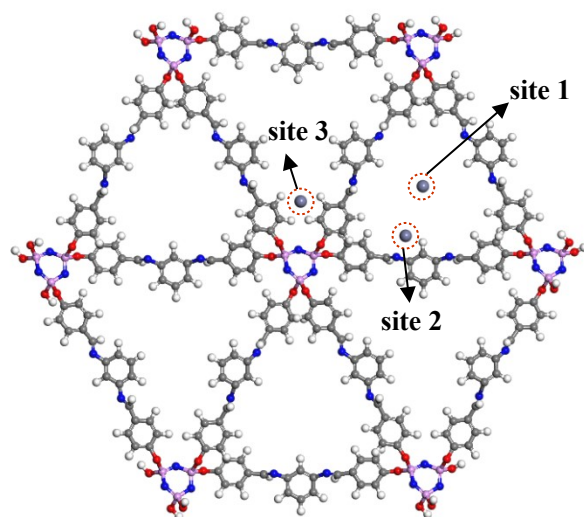

Figure S10. Adsorption energy of Zn<sup>2+</sup> at different positions in PPOP.

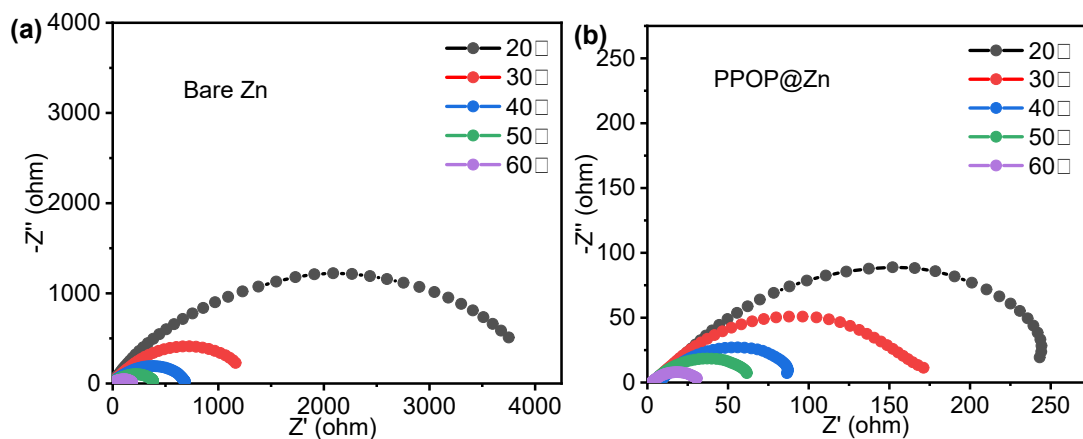

Figure S11. EIS of a) Bare-Zn, b) PPOP@Zn symmetric batteries at different temperatures.

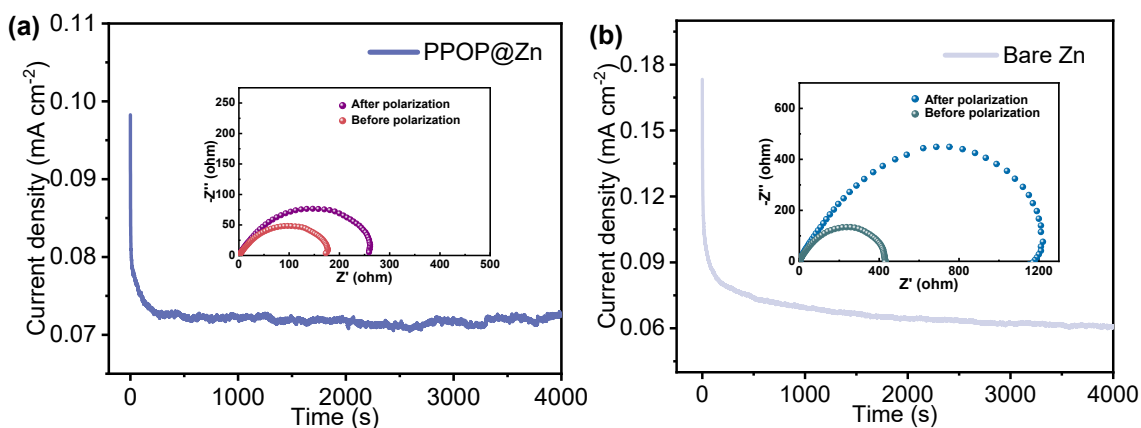

Figure S12. Current-time curves of Zn symmetric cells assembled with a) bare-Zn and b) PPOP@Zn under constant voltage (10 mV) polarization. The insets are the impedance spectra before and after polarization, respectively.

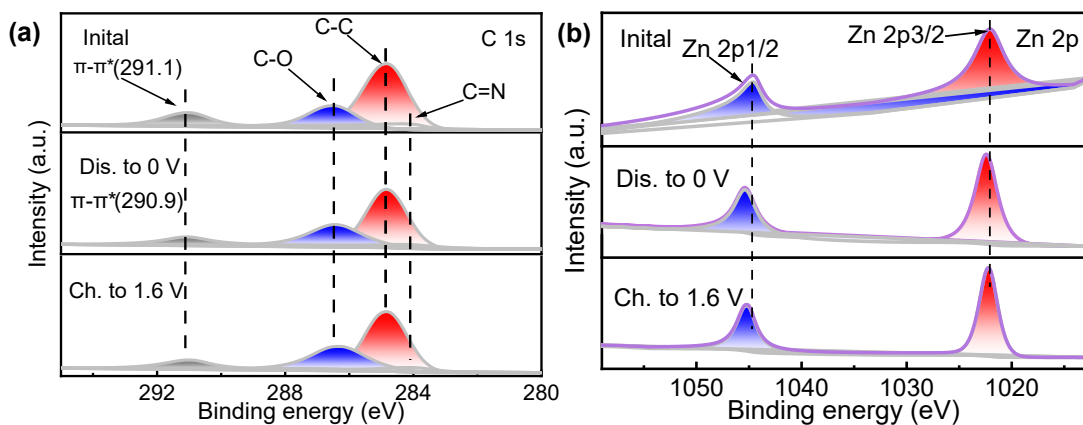

Figure S13. The corresponding a) C 1s and b) Zn 2p spectra of the ex-situ XPS analysis.

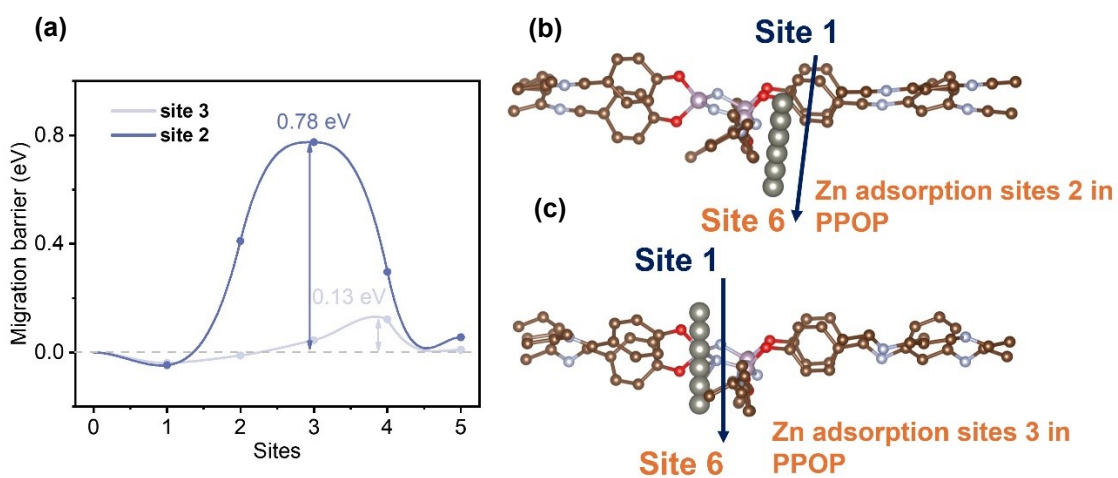

Figure S14. (a) Migration barrier of  $Zn^{2+}$  diffusion on the interlayer of Site 2 and Site 3 in PPOP.

$Zn^{2+}$  diffusion path in the interlayers of (b) Site 2 and (c) Site 3.

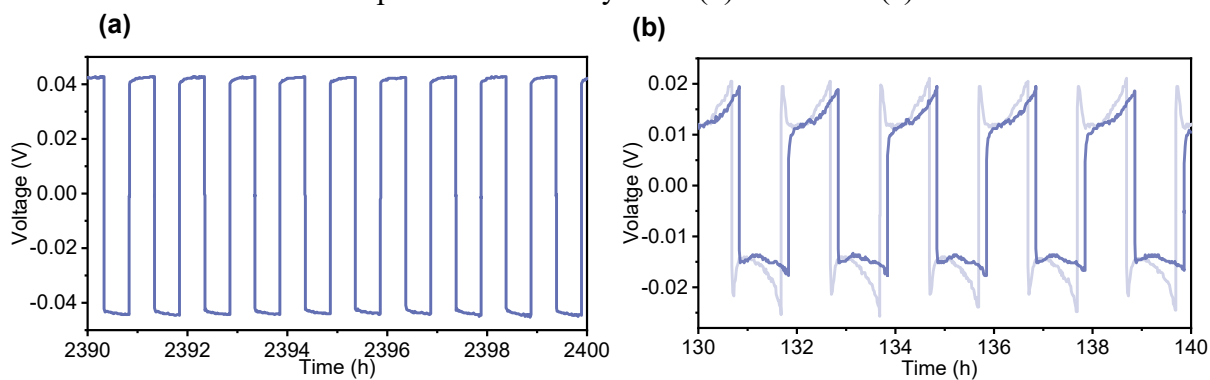

Figure S15. The magnified voltage curves of PPOP@Zn symmetric battery at 2400 h in Figure a) and shows a small polarization voltage in Figure b)

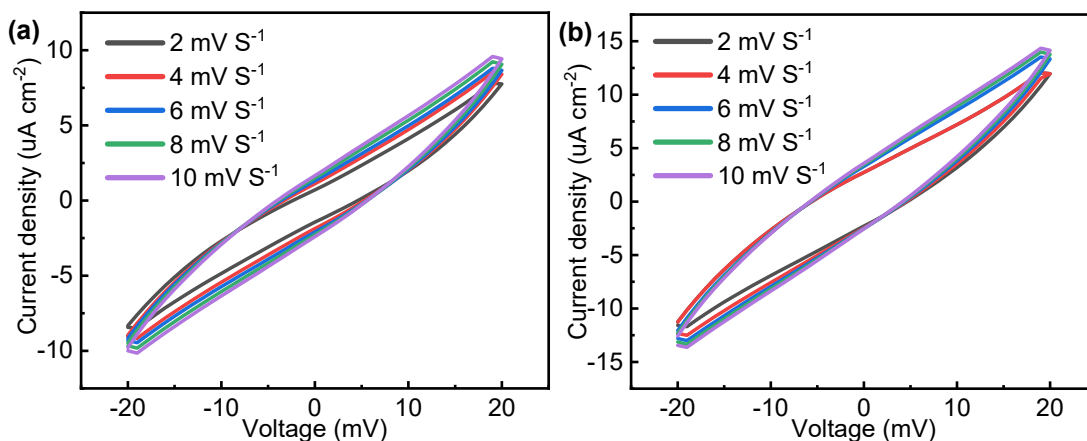

1  
 2 Figure S16. Electric double-layer capacitance (EDLC) measurements for a) bare Zn and b)  
 3 PPOP@Zn. CV curves for Zn||Zn symmetric cells in a voltage range from -20 mV to 20 mV under  
 4 various scanning rates.

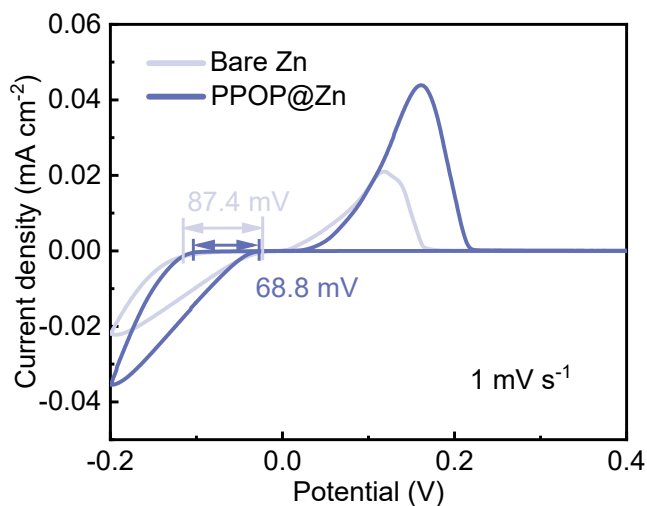

5  
 6 Figure S17. CV curves of Zn||Cu and PPOP@Zn||Cu asymmetric batteries.

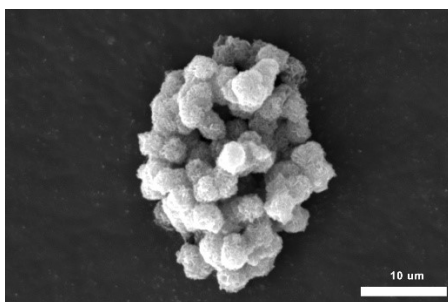

7  
 8 Figure S18. SEM image of NVO powders.

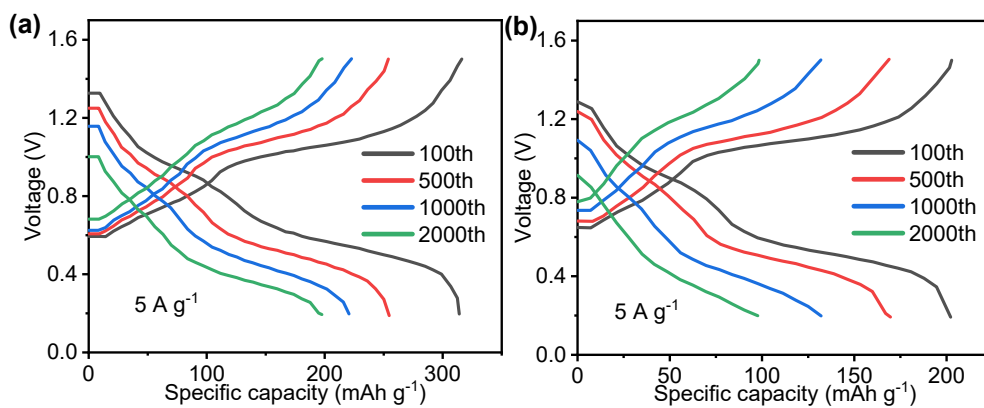

1  
2 Figure S19. charge-discharge curves of PPOP@Zn||NVO and Zn||NVO full cells at  $5 \text{ A g}^{-1}$ .

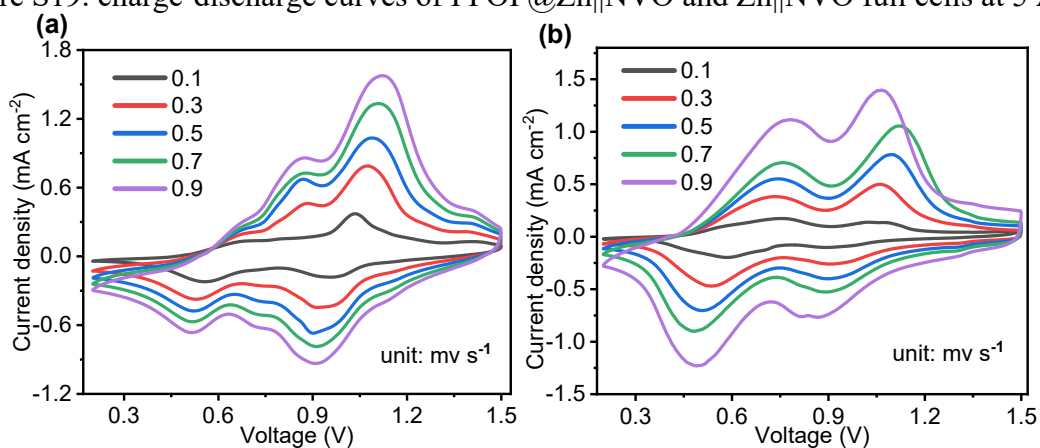

3  
4 Figure S20. CV curve of PPOP@Zn and bare Zn full batteries at different scan rate.

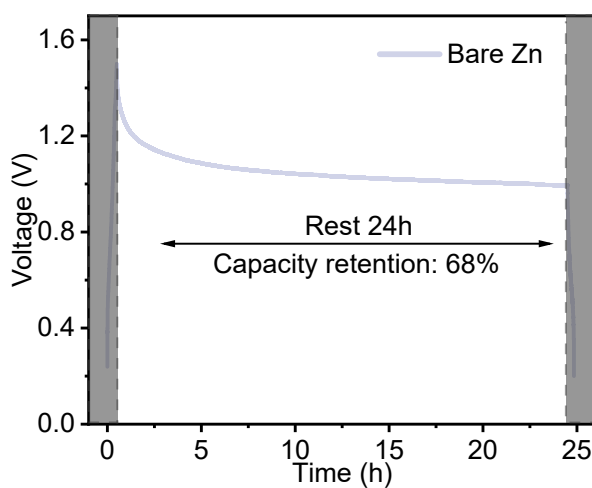

5  
6 Figure S21. Charge-discharge curves of Zn||NVO full batteries.

7

8

9

- 1 Table S1. Comparison of the key Zn-anode performance metrics of PPOP@Zn with recent  
 2 representative studies[1-9].

| Strategy     | Current density (mA cm <sup>-2</sup> ) | Areal capacity (mAh cm <sup>-2</sup> ) | Cycling life (h) | CE (%) | Ref.      |
|--------------|----------------------------------------|----------------------------------------|------------------|--------|-----------|
| PPOP@Zn      | 5                                      | 2.5                                    | > 1800           | 99.60  | This work |
| Literature 1 | 0.5                                    | 0.5                                    | 1250             | 99.80  | Ref.1     |
| Literature 2 | 5                                      | 1                                      | 2000             | 99.31  | Ref.2     |
| Literature 3 | 1                                      | 0.498                                  | 870              | 99.96  | Ref.3     |
| Literature 4 | 25                                     | 1                                      | >                | 99.91  | Ref.4     |
| Literature 5 | 10                                     | 1                                      | 34390<br>> 800   | 97.8   | Ref.5     |
| Literature 6 | 20                                     | 20                                     | > 400            | 99.90  | Ref.6     |
| Literature 7 | 1                                      | 1                                      | 5500             | 99.50  | Ref.7     |
| Literature 8 | 0.5                                    | 0.25                                   | 1800             | 99.80  | Ref.8     |
| Literature 9 | 0.5                                    | 0.25                                   | 2200             | 99.70  | Ref.9     |

3

4

## 1 Reference

- 2 [1] X.-Y. Ren, M.-P. Li, W.-J. Shi, W.-H. Yi, H.-Y. Li, C.-X. Zheng, X.-R. Wang, M.-C. Liu, Y.-X.  
3 Hu, Surface engineering of amide-functionalized microporous polymers for enhanced zincophilicity  
4 and dendrite-free zinc anodes, *Journal of Energy Storage* (2025).  
5 <https://doi.org/10.1016/j.est.2025.118872>.
- 6 [2] W.-H. Yi, W.-J. Shi, M.-P. Li, H.-Y. Li, C.-X. Zheng, X.-Y. Ren, Q. Zhou, M.-C. Liu, Synergistic  
7 ion adsorption and electron transfer in porphyrin-based conjugated microporous polymers enabling  
8 stable Zn anodes, *Chemical Engineering Journal* (2025). <https://doi.org/10.1016/j.cej.2025.167625>.
- 9 [3] P. Sintipditsakul, C. Yang, Z. Dai, N. Kiatwisarnkij, K. Lolupiman, P. Woottapanit, X. Zhang, P.  
10 Wangyao, J. Qin, Construction of Artificial Interface Layer in the Fly Ash Suspension for Durable  
11 Zn Anode, *ACS Applied Energy Materials* (2025). <https://doi.org/10.1021/acsaem.4c02966>.
- 12 [4] C. Yuan, C. Wang, D. Guo, J. Zhang, J. Sun, S. Tian, H. Lu, H. Quan, X. Zhan, C. Sun, S. Wang,  
13 Colloid size engineering enables ultra-stable Zn anodes via electrokinetic and interfacial regulation,  
14 *Chemical Engineering Journal* (2026). <https://doi.org/10.1016/j.cej.2026.174400>.
- 15 [5] C. Yuan, J. Xiao, C. Liu, X. Zhan, Elucidating synergistic mechanisms of an anion–cation  
16 electrolyte additive for ultra-stable zinc metal anodes, *Journal of Materials Chemistry A* (2024).  
17 <https://doi.org/10.1039/d4ta03414g>.
- 18 [6] X. Sun, X. Zhan, C. Wu, Z. Gu, W. Han, H. Zhang, L. Zhu, Mechanistic Insights into Dendrite  
19 Growth in Aqueous Zinc-Ion Batteries with Trace Propylene Carbonate Electrolyte Additive, *ACS*  
20 *Energy Letters* (2026). <https://doi.org/10.1021/acseenergylett.5c04147>.
- 21 [7] C. Yang, P. Woottapanit, S. Geng, R. Chanajaree, K. Lolupiman, W. Limphirat, X. Zhang, J. Qin,  
22 Biomimetic Inorganic–Organic Protective Layer for Highly Stable and Reversible Zn Anodes, *ACS*  
23 *Energy Letters* (2024). <https://doi.org/10.1021/acseenergylett.4c03005>.
- 24 [8] P. Tanapornchinpong, C.-W. Yang, Y.-H. Zhao, N. Kiatwisarnkij, K. Lolupiman, S. Rajendran,  
25 Y.-P. Lei, X.-Y. Zhang, P. Wangyao, J.-Q. Qin, Enhanced Zn plating and stripping behavior of the  
26 utilized fly ash-coated Zn anode for zinc-ion batteries, *Rare Metals* (2025).  
27 <https://doi.org/10.1007/s12598-025-03298-8>.
- 28 [9] P. Woottapanit, C. Yang, S. Geng, K. Lolupiman, W. Limphirat, X. Zhang, G. He, J. Qin, Electron  
29 Donation Effect of  $\alpha$ -Boron Nanosheet Enables Highly Stable Zinc Metal Anode, *Advanced*  
30 *Functional Materials* (2025). <https://doi.org/10.1002/adfm.202507725>.
